# Supplementary material for: A 12-Week-Long Intake of Bilberry Extract (Vaccinium myrtillus L.) Improved Objective Findings of Ciliary Muscle Contraction of the Eye: A Randomized, Double-Blind, Placebo-Controlled, Parallel-Group Comparison Trial
Source: PubMed Central journal article supplement (PMC7146147; doi:10.3390/nu12030600), 2020-02-25
Supplement: nutrients-12-00600-s001.pdf [file nutrients-12-00600-s001.pdf]

## CONSORT 2010 Flow Diagram

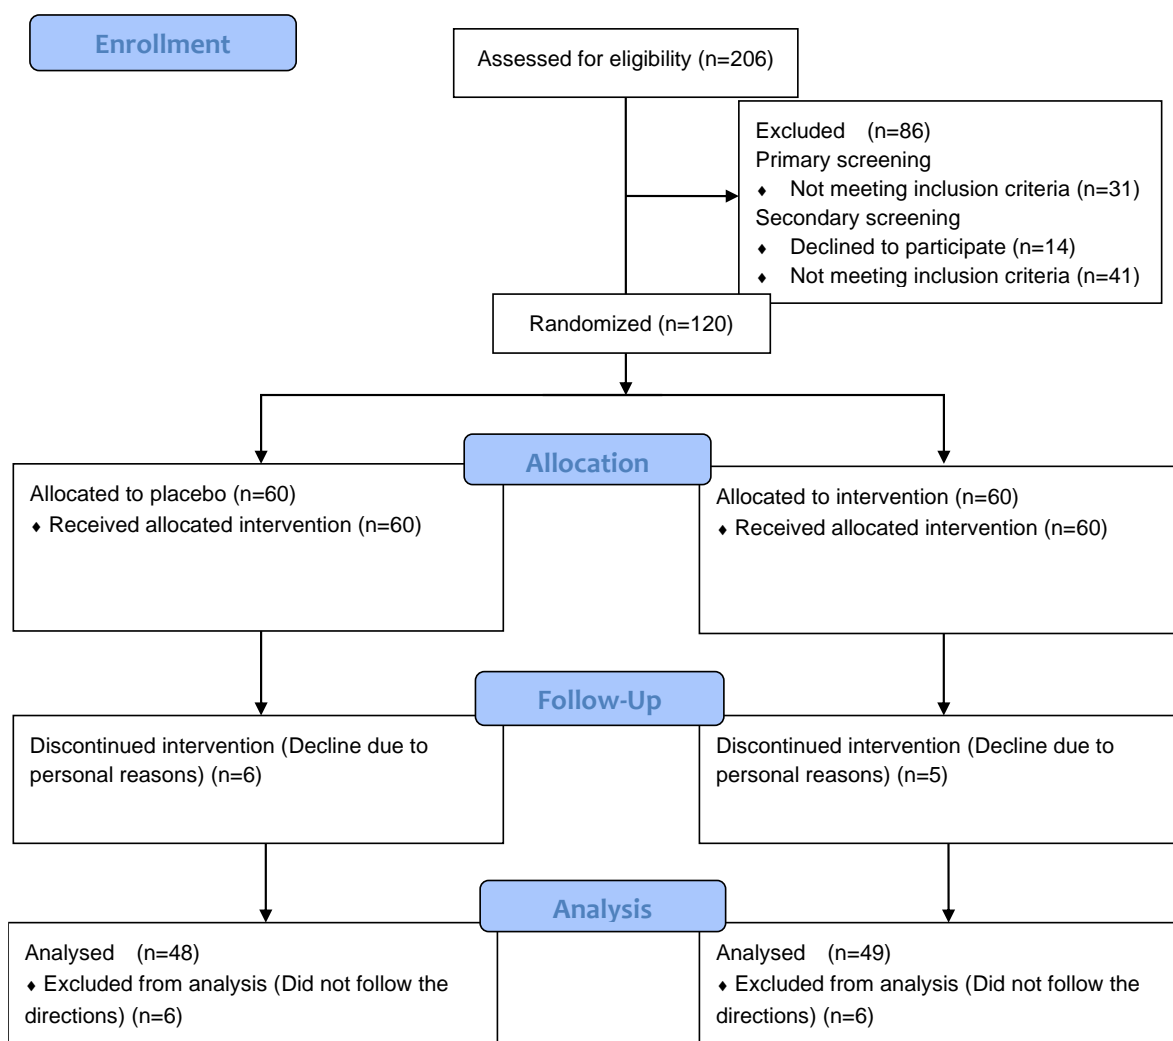

**Figure S1.** CONSORT 2010 Flow Diagram.

**Table S1.** CONSORT 2010 checklist of information to include when reporting a randomised trial.

| Section/Topic             | Item No | Checklist item                                                                                                          | Reported on page No |
|---------------------------|---------|-------------------------------------------------------------------------------------------------------------------------|---------------------|
| <b>Title and abstract</b> |         |                                                                                                                         |                     |
|                           | 1a      | Identification as a randomised trial in the title                                                                       | 1                   |
|                           | 1b      | Structured summary of trial design, methods, results, and conclusions (for specific guidance see CONSORT for abstracts) | 1                   |
| <b>Introduction</b>       |         |                                                                                                                         |                     |
| Background and objectives | 2a      | Scientific background and explanation of rationale                                                                      | 1, 2                |
|                           | 2b      | Specific objectives or hypotheses                                                                                       | 1, 2                |
| <b>Methods</b>            |         |                                                                                                                         |                     |
| Trial design              | 3a      | Description of trial design (such as parallel, factorial) including allocation ratio                                    | 2, 3                |
|                           | 3b      | Important changes to methods after trial commencement (such as eligibility criteria), with reasons                      | -                   |
| Participants              | 4a      | Eligibility criteria for participants                                                                                   | 2, 3                |

|                                                      |     |                                                                                                                                                                                             |      |
|------------------------------------------------------|-----|---------------------------------------------------------------------------------------------------------------------------------------------------------------------------------------------|------|
|                                                      | 4b  | Settings and locations where the data were collected                                                                                                                                        | 2    |
| Interventions                                        | 5   | The interventions for each group with sufficient details to allow replication, including how and when they were actually administered                                                       | 2-4  |
| Outcomes                                             | 6a  | Completely defined pre-specified primary and secondary outcome measures, including how and when they were assessed                                                                          | 4, 5 |
|                                                      | 6b  | Any changes to trial outcomes after the trial commenced, with reasons                                                                                                                       | -    |
| Sample size                                          | 7a  | How sample size was determined                                                                                                                                                              | 3    |
|                                                      | 7b  | When applicable, explanation of any interim analyses and stopping guidelines                                                                                                                | -    |
| Randomisation:                                       |     |                                                                                                                                                                                             |      |
| Sequence generation                                  | 8a  | Method used to generate the random allocation sequence                                                                                                                                      | 3    |
|                                                      | 8b  | Type of randomisation; details of any restriction (such as blocking and block size)                                                                                                         | 3    |
| Allocation concealment mechanism                     | 9   | Mechanism used to implement the random allocation sequence (such as sequentially numbered containers), describing any steps taken to conceal the sequence until interventions were assigned | 3    |
| Implementation                                       | 10  | Who generated the random allocation sequence, who enrolled participants, and who assigned participants to interventions                                                                     | 3    |
| Blinding                                             | 11a | If done, who was blinded after assignment to interventions (for example, participants, care providers, those assessing outcomes) and how                                                    | 3    |
|                                                      | 11b | If relevant, description of the similarity of interventions                                                                                                                                 | -    |
| Statistical methods                                  | 12a | Statistical methods used to compare groups for primary and secondary outcomes                                                                                                               | 5    |
|                                                      | 12b | Methods for additional analyses, such as subgroup analyses and adjusted analyses                                                                                                            | -    |
| <b>Results</b>                                       |     |                                                                                                                                                                                             |      |
| Participant flow (a diagram is strongly recommended) | 13a | For each group, the numbers of participants who were randomly assigned, received intended treatment, and were analysed for the primary outcome                                              | 5,6  |
|                                                      | 13b | For each group, losses and exclusions after randomisation, together with reasons                                                                                                            | 5,6  |
| Recruitment                                          | 14a | Dates defining the periods of recruitment and follow-up                                                                                                                                     | 5    |
|                                                      | 14b | Why the trial ended or was stopped                                                                                                                                                          | -    |
| Baseline data                                        | 15  | A table showing baseline demographic and clinical characteristics for each group                                                                                                            | 5    |
| Numbers analysed                                     | 16  | For each group, number of participants (denominator) included in each analysis and whether the analysis was by original assigned groups                                                     | 5,6  |
| Outcomes and estimation                              | 17a | For each primary and secondary outcome, results for each group, and the estimated effect size and its precision (such as 95% confidence interval)                                           | 6,7  |
|                                                      | 17b | For binary outcomes, presentation of both absolute and relative effect sizes is recommended                                                                                                 | -    |
| Ancillary analyses                                   | 18  | Results of any other analyses performed, including subgroup analyses and adjusted analyses, distinguishing pre-specified from exploratory                                                   | -    |
| Harms                                                | 19  | All important harms or unintended effects in each group (for specific guidance see CONSORT for harms)                                                                                       | 7    |
| <b>Discussion</b>                                    |     |                                                                                                                                                                                             |      |
| Limitations                                          | 20  | Trial limitations, addressing sources of potential bias, imprecision, and, if relevant, multiplicity of analyses                                                                            | 7,8  |
| Generalisability                                     | 21  | Generalisability (external validity, applicability) of the trial findings                                                                                                                   | 7,8  |
| Interpretation                                       | 22  | Interpretation consistent with results, balancing benefits and harms, and considering other relevant evidence                                                                               | 7,8  |
| <b>Other information</b>                             |     |                                                                                                                                                                                             |      |
| Registration                                         | 23  | Registration number and name of trial registry                                                                                                                                              | 2    |
| Protocol                                             | 24  | Where the full trial protocol can be accessed, if available                                                                                                                                 | -    |

---

Funding

25

Sources of funding and other support (such as supply of drugs), role  
of funders

---

8
